# Supplementary material for: Cancer-specific type-I interferon receptor signaling promotes cancer stemness and effector CD8+ T-cell exhaustion
Source: PubMed Central journal article supplement — Oncoimmunology. 2021 Nov 13;10(1):1997385. doi: 10.1080/2162402X.2021.1997385 (PMC8632299; doi:10.1080/2162402x.2021.1997385), 2021-11-13
Supplement: KONI_A_1997385_SM6787.pdf [file KONI_A_1997385_SM6787.pdf]

1 **Supplementary Materials (Gong, Donnelly, Heath et al.):** Six supplementary figures and  
2 three supplementary tables are provided for this manuscript.

3

4

### Supplementary Figure 1

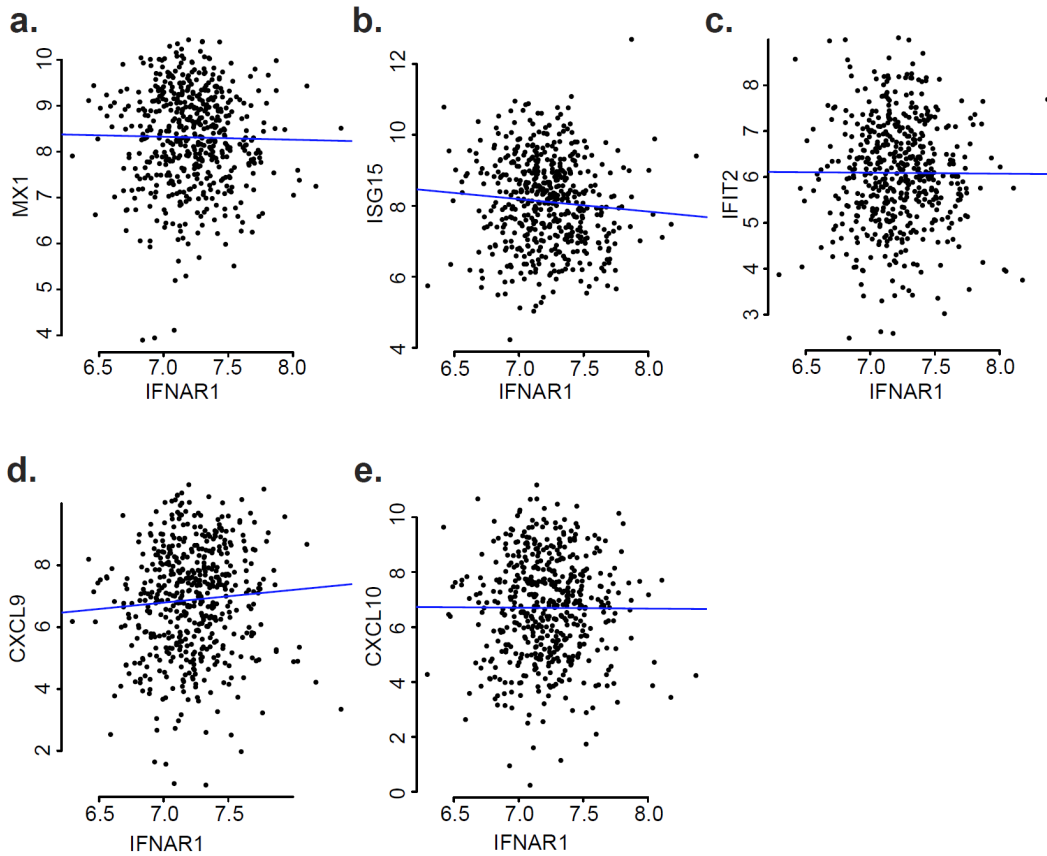

5

6 **Supplementary Figure 1. The expression levels of *IFNAR1* were not correlated with**  
7 **interferon-stimulated genes in HNSCC specimens.** Spearman's correlation analysis was  
8 performed to assess the relationship between the expression levels of *IFNAR1* and those of *MX1*  
9 **(a), *ISG15* (b), *IFIT2* (c), *CXCL9* (d) and *CXCL10* (e)** among 520 HNSCC specimens in the  
10 TCGA database. Each dot represents one HNSCC specimen.

11

12

## Supplementary Figure 2

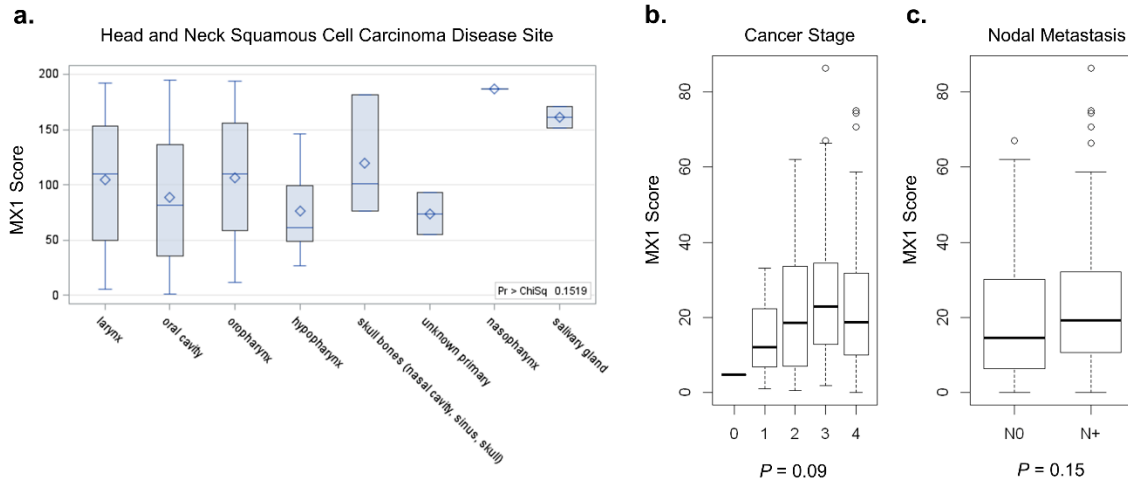

13

### 14 **Supplementary Figure 2. Association of MX1 immunohistochemical scores with disease**

15 **site, cancer stage, and nodal metastasis.** Raw MX1 scores were generated by quantifying MX1

16 immunohistochemical staining in TMAs from 195 HNSCC patients, followed by correlation with

17 primary disease site (a), cancer stage (b), or status of nodal metastasis (c). No statistical

18 differences were observed between MX1 and any of these variables, although a non-statistically

19 significant positive association was observed between MX1 score and increased HNSCC cancer

20 stages ( $P = 0.09$ ). Univariate Cox linear regression modeling was used to analyze the association

21 between MX1 score and each variable.

22

### Supplementary Figure 3

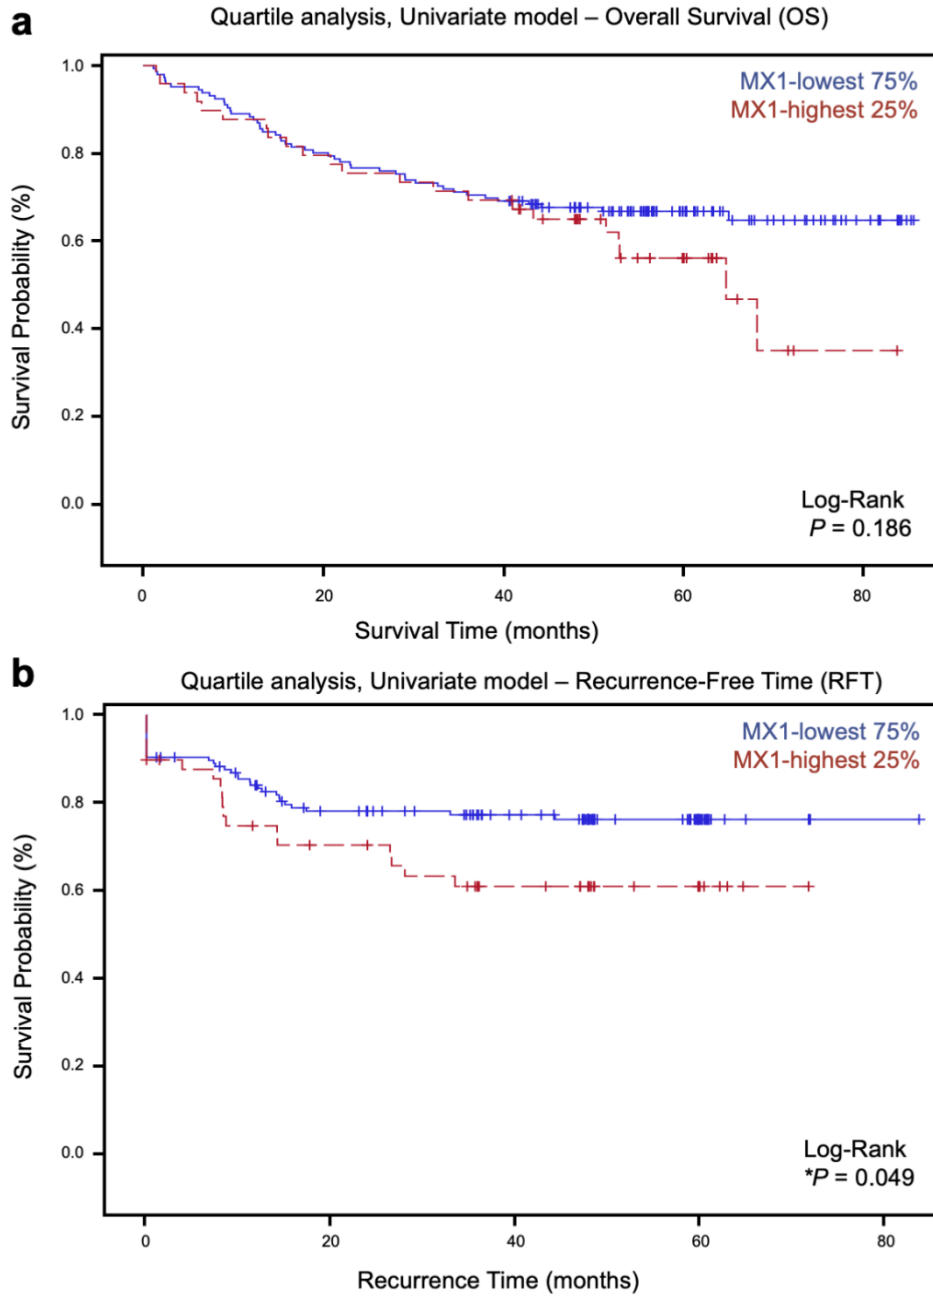

26 **Supplementary Figure 3. a-b** MX1 immunohistochemical scores were segregated for patients  
27 in the highest quartile vs. all other patients (lowest 75%) and the Kaplan-Meier curves of each  
28 group were compared for overall survival (**a**) or recurrence-free time (**b**) using a log-rank test.

### Supplementary Figure 4

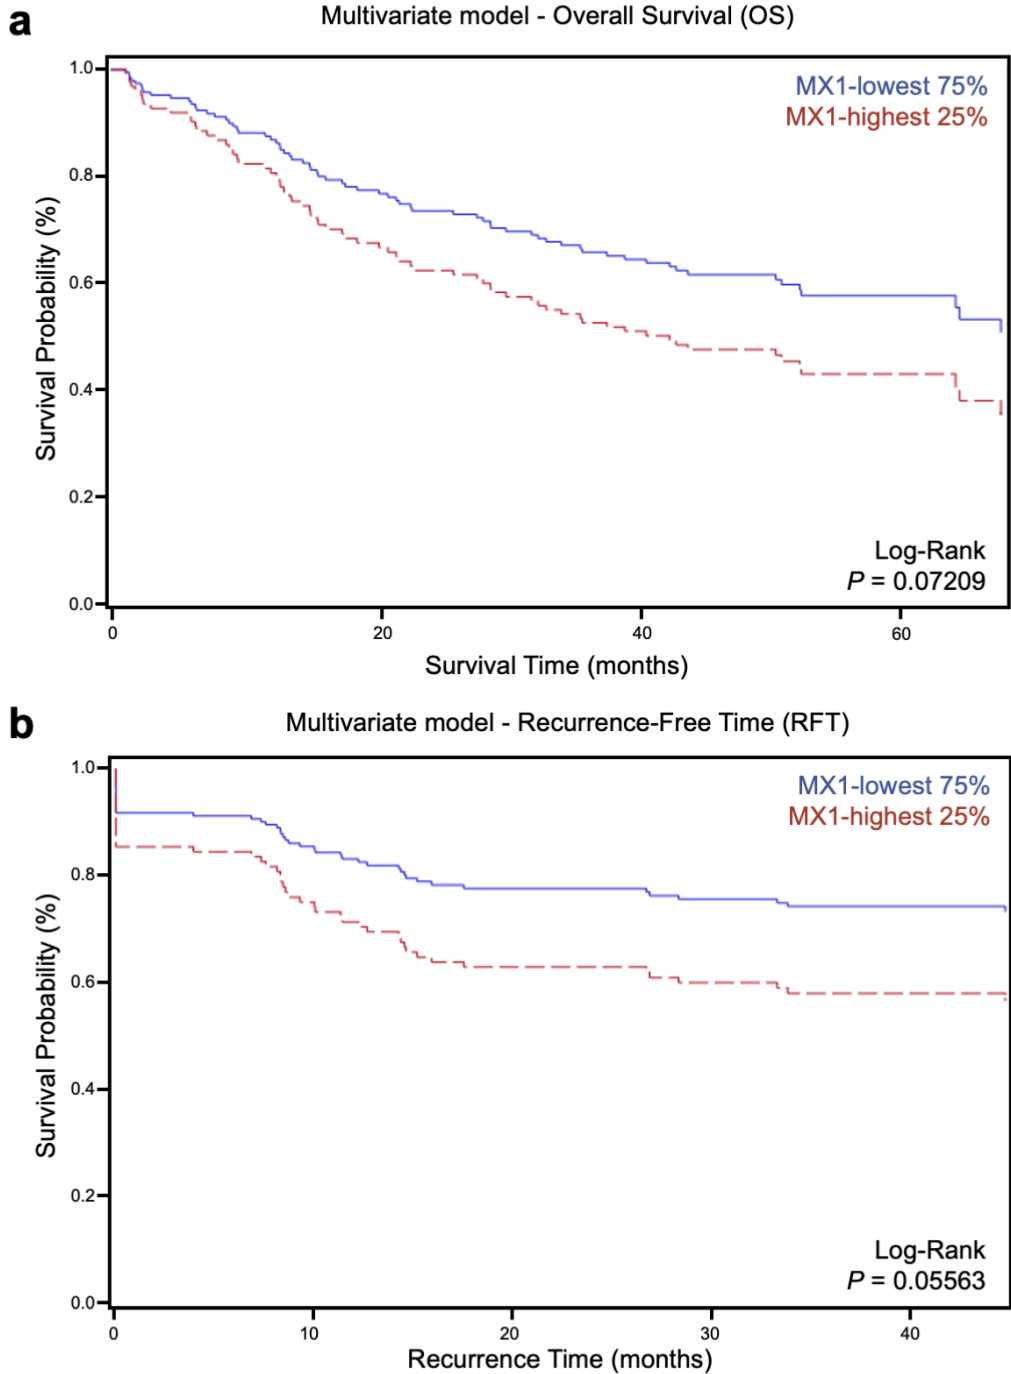

30

31

32 **Supplementary Figure 4. a-b** MX1 immunohistochemical scores were segregated for patients

33 in the highest quartile vs. patients in the lowest 75% following construction of a multivariate

34 model which assumes the following parameters: 59 years old, advanced stage (3 or 4), oral  
35 cavity cancer, mild comorbidities, and average CD4<sup>+</sup> and CD8<sup>+</sup> T-cell infiltration (15 cells/mm<sup>2</sup>).  
36 Kaplan-Meier curves of each group were compared for overall survival (**a**) or recurrence-free  
37 time (**b**) using a log-rank test.

38

Supplementary Figure 5

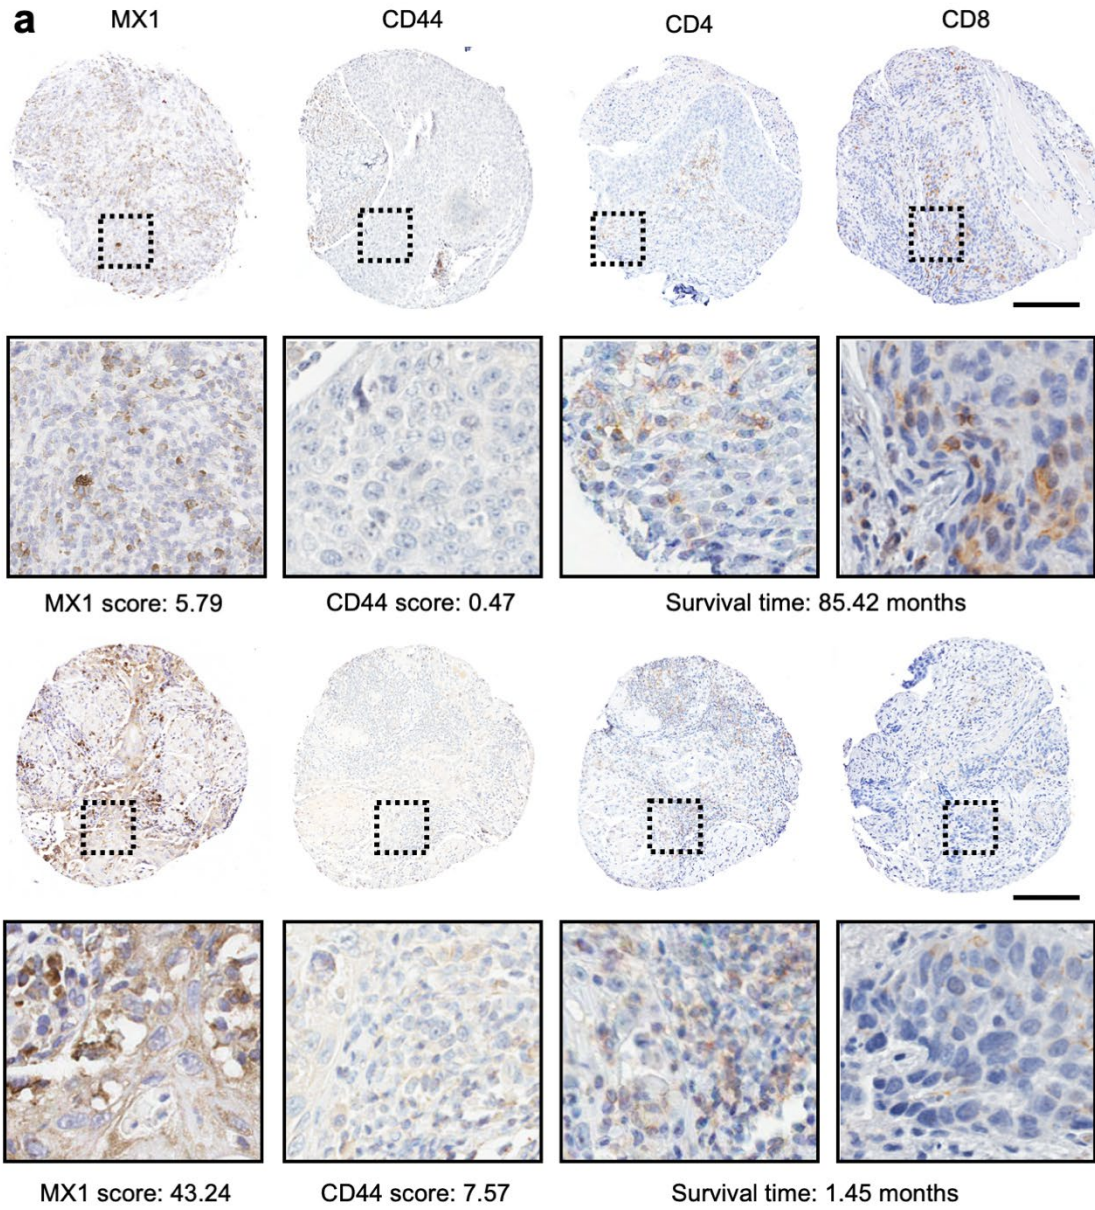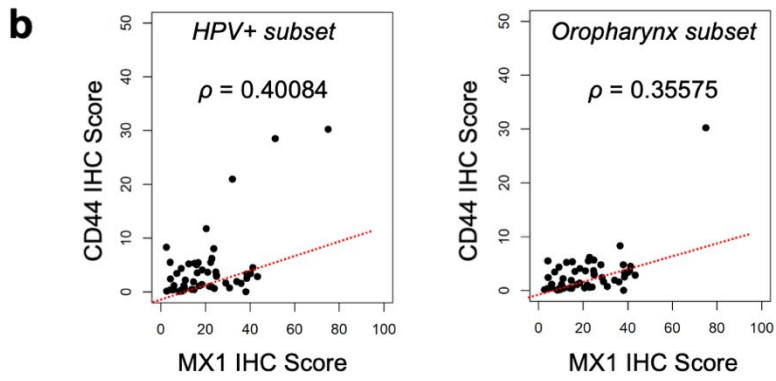

41 **Supplementary Figure 5. Representative immunohistochemical staining for MX1 in**  
42 **conjunction with CD4, CD8, and CD44.** TMAs were stained for MX1, CD4, CD8, or CD44,  
43 followed by quantification of MX1 and CD44 IHC scores selectively within cancer cells. **(a)**  
44 Representative images of each marker from an MX1-low core (upper panels) or MX1-high core  
45 (lower panels). Scale bar: 200  $\mu$ m. **(b)** The HNSCC cancer stem cell marker CD44 was  
46 positively correlated with MX1 in HPV<sup>+</sup> tumors (left panel; n = 54 patients) and oropharyngeal  
47 tumors (right panel; n = 52 patients).

48

49

50



51

### Supplementary Figure 6

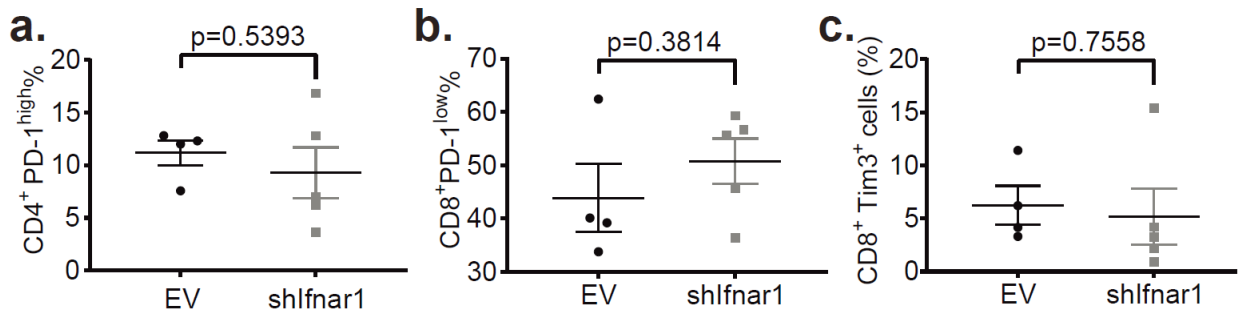

52

53 **Supplementary Figure 6. Ifnar1-deficient-tumor bearing mice show comparable effector**  
54 **populations in the spleen.** Spleens were harvested 36 days following tumor implantation, and  
55 lymphocytes were isolated using a Ficoll-Paque gradient. The proportion of (a) CD4<sup>+</sup>PD-1<sup>high</sup>,  
56 (b) CD8<sup>+</sup>PD-1<sup>low</sup> and (c) CD8<sup>+</sup>Tim3<sup>+</sup> TILs were assessed by flow cytometry. Gating strategy was  
57 as follows: Lymphocytes, single cells, Zombie Aqua negative (viability), CD45-positive, CD3-  
58 positive (n=4 in the control group and n=5 in the shIfnar1 group). All Comparisons between the  
59 two groups were made using a two-tailed unpaired *t* test.

60

61

62

63

64

65

66

67 **Supplementary Table 1** - Descriptive statistics for MX1 and CD44 immunohistochemical  
68 staining scores obtained by Aperio ImageScope quantification of TMAs. MX1 scores were  
69 available from 195 patients, CD44 scores were available from 262 patients, and both MX1 and  
70 CD44 scores were available from 181 HNSCC patients.

71

---

| <b>Protein</b> | <b><i>n</i></b> | <b>Mean</b> | <b>SD</b> | <b>Median</b> | <b>Minimum</b> | <b>Maximum</b> | <b>25<sup>th</sup><br/>Percentile</b> | <b>75<sup>th</sup><br/>Percentile</b> |
|----------------|-----------------|-------------|-----------|---------------|----------------|----------------|---------------------------------------|---------------------------------------|
| MX1            | 195             | 22.01       | 16.925    | 18.534        | 0.1144         | 86.25          | 9.33                                  | 31.94                                 |
| CD44           | 262             | 7.39        | 8.128     | 4.577         | 0.0375         | 40.68          | 1.475                                 | 10.31                                 |

---

72

73

74 **Supplementary Table 2.** Number of cells detected for each tumor immune cell cluster identified  
 75 by single cell RNA-sequencing and immune cell deconvolution.

| Cell cluster | Cell identity                                                | Total number of cells detected |
|--------------|--------------------------------------------------------------|--------------------------------|
| Cluster 1    | Myeloid-derived suppressor cells                             | 2112                           |
| Cluster 2    | Myeloid-derived suppressor cells                             | 1263                           |
| Cluster 3    | Tcf7 <sup>+</sup> CD4 <sup>+</sup> T-cells                   | 1217                           |
| Cluster 4    | CXCR5 <sup>+</sup> B-cells                                   | 1066                           |
| Cluster 5    | Myeloid-derived suppressor cells                             | 1009                           |
| Cluster 6    | Tbet1 <sup>+</sup> PD1 <sup>+</sup> CD8 <sup>+</sup> T-cells | 906                            |
| Cluster 7    | Myeloid-derived suppressor cells                             | 778                            |
| Cluster 8    | Myeloid-derived suppressor cells                             | 684                            |
| Cluster 9    | Myeloid-derived suppressor cells                             | 674                            |
| Cluster 10   | CXCR5 <sup>+</sup> B-cells                                   | 598                            |
| Cluster 11   | CXCR5 <sup>+</sup> B-cells                                   | 507                            |
| Cluster 12   | Myeloid-derived suppressor cells                             | 500                            |
| Cluster 13   | M2-like macrophages                                          | 471                            |
| Cluster 14   | Tumor cells                                                  | 292                            |
| Cluster 15   | Regulatory T-cells                                           | 220                            |
| Cluster 16   | $\gamma\delta$ T-cells                                       | 219                            |
| Cluster 17   | Natural killer cells                                         | 174                            |
| Cluster 18   | Tcf7 <sup>+</sup> CD8 <sup>+</sup> T-cells                   | 143                            |
| Cluster 19   | Basophils                                                    | 47                             |
| Cluster 20   | Conventional dendritic cells type 1                          | 27                             |

76
